# Supplementary material for: Endohedrally stabilized C70 isomer with fused pentagons characterized by crystallography
Source: Royal Society of Chemistry journal article supplement (doi:10.1039/c6dt00074f), 2016-01-01
Supplement: c6dt00074f1.pdf [file c6dt00074f1.pdf]

Supporting Information for

## Endohedrally Stabilized C<sub>70</sub> Isomer with Fused Pentagons Characterized by Crystallography

*Lai Feng,<sup>\*a</sup> Meirong Zhang,<sup>a</sup> Yajuan Hao,<sup>a</sup> Qiangqiang Tang,<sup>b</sup> Ning Chen,<sup>\*b</sup> Zdeněk Slanina,<sup>\*c</sup> Filip Uhlík<sup>d</sup>*

<sup>a</sup>College of Physics, Optoelectronics and Energy & Collaborative Innovation Center of Suzhou Nano Science and Technology, Soochow University, Suzhou 215006, China

<sup>b</sup>Laboratory of Advanced Optoelectronic Materials, College of Chemistry, Chemical Engineering and Materials Science, Soochow University, Suzhou 212163, China.

<sup>c</sup>Life Science Center of Tsukuba Advanced Research Alliance, University of Tsukuba, Tsukuba 305-8577, Japan

<sup>d</sup>Department of Physical and Macromolecular Chemistry, Faculty of Science, Charles University in Prague, Albertov 6, 128 43 Praha 2, Czech Republic

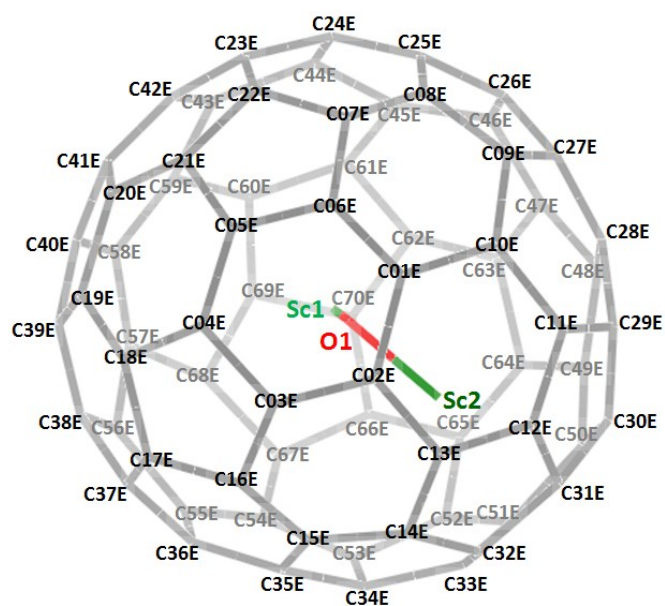

**Figure S1.** Three-dimensional diagrams of the  $C_2(7892)-C_{70}$  cage with enantiomeric systematic numbering schemes, showing a  $^{13}C$  configuration.

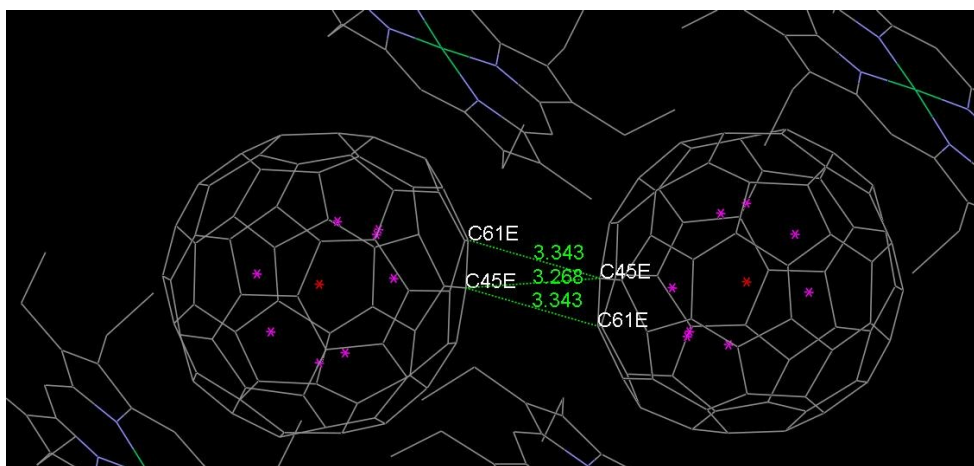

**Figure S2.** View of the structure of  $\text{Sc}_2\text{O}@C_2(7892)\text{-C}_{70}\cdot[\text{Ni}^{\text{II}}(\text{OEP})]\cdot 0.5\text{C}_6\text{H}_6\cdot 1.5\text{CHCl}_3$  showing the close contact between the adjacent  $\text{C}_{70}$  cages in the unit cell.

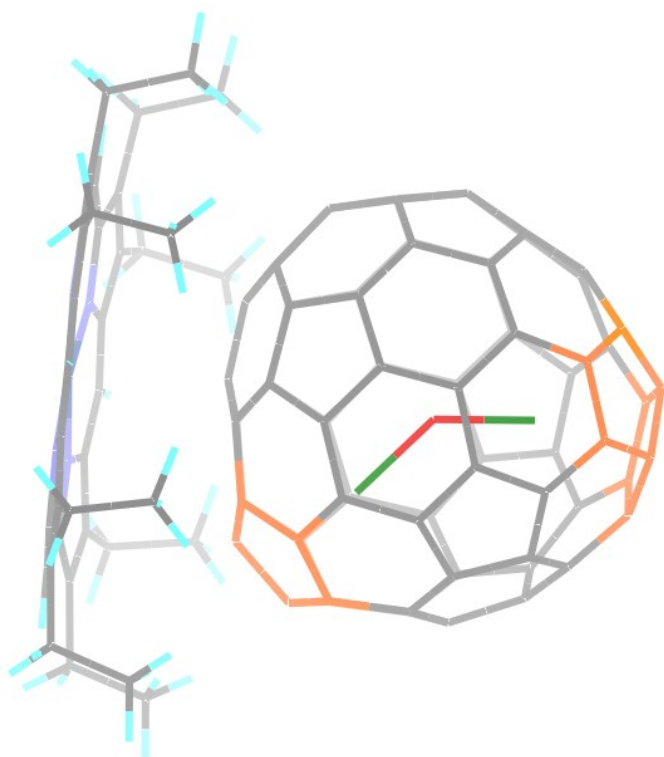

**Figure S3.** DFT-optimized structure of  $\text{Sc}_2\text{O}@C_2(7892)\text{-C}_{70}\cdot[\text{Ni}^{\text{II}}(\text{OEP})]$  complex.

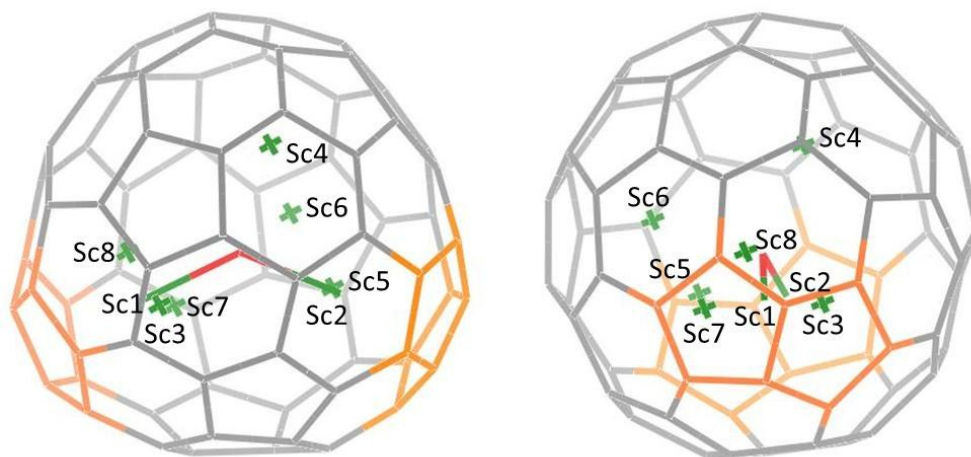

**Figure S4.** Two views of the X-ray structure of  $\text{Sc}_2\text{O}@C_2(7892)\text{-C}_{70}$ , showing all the identified Sc sites (Sc1-Sc8) inside the  $\text{C}_{70}$  cage.

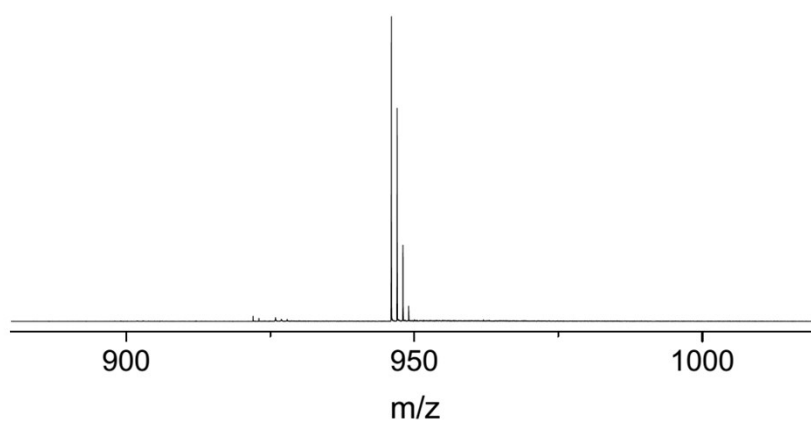

**Figure S5.** MALDI-TOF mass spectrum of the purified sample  $\text{Sc}_2\text{O}@C_{70}$  in a positive-ion reflection mode.

**Table S1.** Crystal and structure data of  $\text{Sc}_2\text{O}@C_2(7892)\text{-}C_{70}\cdot[\text{Ni}^{\text{II}}(\text{OEP})]\cdot 0.5C_6H_6\cdot 1.5CHCl_3$  at 120 K.

|                        |                                                                                                                     |                                   |                                             |
|------------------------|---------------------------------------------------------------------------------------------------------------------|-----------------------------------|---------------------------------------------|
| Temperature            | T=120(2) K                                                                                                          | Crystal size                      | 0.20×0.15×0.15<br>mm <sup>3</sup>           |
| Empirical formula      | $\text{Sc}_2\text{O}@C_2(7892)\text{-}C_{70}\cdot[\text{Ni}^{\text{II}}(\text{OEP})]\cdot 0.5C_6H_6\cdot 1.5CHCl_3$ | Theta range for data collection   | 2.624° to 25.510°                           |
| Formula weight         | 1756.19                                                                                                             | Index ranges                      | -17≤h≤17                                    |
| Wavelength             | 0.71073 Å                                                                                                           |                                   | -17≤k≤17                                    |
| Crystal system         | triclinic                                                                                                           |                                   | -22≤l≤22                                    |
| Space group            | P -1 (No. 2)                                                                                                        | Reflections collected             | 99396                                       |
| Unit cell dimensions   | a= 14.452(3)<br>b=14.462(3)<br>c = 18.805(4)<br>α= 86.30(3),<br>β= 87.93(3),<br>γ= 62.15(3)                         | Independent reflections           | 12764 (>2sigma(I))                          |
| Volume                 | 3467.8(15) Å <sup>3</sup>                                                                                           | Completeness to θ                 | 0.988 (θ= 25.510°)                          |
| Z                      | 2                                                                                                                   | Absorption correction             | Multi-scan                                  |
| Density                | 1.682 gcm <sup>-3</sup>                                                                                             | Max. and min. transmission        | 0.986 and 0.972                             |
| Absorption coefficient | 0.701 mm <sup>-1</sup>                                                                                              | Refinement method                 | Full-matrix least-squares on F <sup>2</sup> |
| F(000)                 | 1788.0                                                                                                              | Data/ parameters / restraints     | 12764/1220/925                              |
|                        |                                                                                                                     | Goodness-of-fit on F <sup>2</sup> | 1.052                                       |
|                        |                                                                                                                     | Final R indices [I>2sigma(I)]     | R1= 0.1086, wR2= 0.2953                     |
|                        |                                                                                                                     | R indices (all data)              | R1= 0.1227, wR2= 0.3091                     |
|                        |                                                                                                                     | Largest diff. peak hole           | 2.237 and -1.753e/Å <sup>-3</sup>           |

Coordinates of DFT-optimized Sc<sub>2</sub>O@C<sub>2</sub>(7892)-C<sub>70</sub>[Ni<sup>II</sup>(OEP)] complex

|   |           |           |           |
|---|-----------|-----------|-----------|
| H | -2.213851 | -2.361763 | -6.268533 |
| H | -2.121320 | 2.530945  | -6.260755 |
| C | -2.364033 | -2.275117 | -5.188365 |
| H | -4.134147 | -3.516646 | -5.129407 |
| H | -4.473444 | -1.811679 | -5.353510 |
| H | -1.716073 | -3.003854 | -4.690271 |
| H | -2.036933 | -1.278424 | -4.872170 |
| H | -4.370965 | 2.107962  | -5.283558 |
| C | -3.832191 | -2.514170 | -4.807944 |
| C | -2.235530 | 2.453916  | -5.175537 |
| H | -3.932565 | 3.786116  | -5.038061 |
| H | -1.943662 | 1.442826  | -4.867779 |
| C | -3.676054 | 2.762673  | -4.744556 |
| H | -1.536249 | 3.152202  | -4.704994 |
| H | -3.960532 | 0.125963  | -4.328494 |
| H | -4.329755 | -5.108596 | -3.576885 |
| C | -4.054699 | -2.375434 | -3.333050 |
| C | 2.829125  | -0.531731 | -3.695053 |
| H | -1.897897 | -4.857766 | -3.005764 |
| C | 2.245788  | 0.767205  | -3.817700 |
| H | -2.518792 | -6.411576 | -2.412892 |
| C | -4.027217 | 0.114692  | -3.245471 |
| C | 2.048613  | -1.642201 | -3.300888 |
| H | -3.908465 | 5.337225  | -3.456294 |
| C | -4.026829 | -4.835138 | -2.560542 |
| C | 0.891803  | 0.969976  | -3.564009 |
| C | 4.187563  | -0.356460 | -3.214763 |
| C | -3.866564 | 2.603190  | -3.266953 |
| C | 3.210838  | 1.738647  | -3.364533 |
| C | -2.594832 | -5.325712 | -2.302747 |
| C | 0.617904  | -1.435190 | -3.025665 |
| C | 0.086146  | -0.132047 | -3.121239 |
| C | 4.398521  | 1.047275  | -2.960545 |
| C | -4.140828 | -3.351783 | -2.386869 |
| C | -4.107201 | -1.115682 | -2.620914 |
| C | 2.731634  | -2.689735 | -2.588592 |
| H | -4.721436 | -5.348941 | -1.885852 |
| H | -1.503393 | 4.879224  | -2.790042 |
| C | 4.807158  | -1.334375 | -2.415914 |
| C | -3.999563 | 1.331771  | -2.587770 |
| C | 0.470792  | 2.162676  | -2.875159 |
| C | 4.074906  | -2.520418 | -2.117216 |

|    |           |           |           |
|----|-----------|-----------|-----------|
| C  | 2.803684  | 2.872941  | -2.683231 |
| C  | -3.646949 | 5.032229  | -2.437458 |
| C  | -3.862299 | 3.556611  | -2.293486 |
| H  | -2.037194 | 6.501818  | -2.300735 |
| H  | -2.269094 | -5.056243 | -1.291978 |
| C  | -0.061196 | -2.328742 | -2.103969 |
| C  | -2.194240 | 5.430899  | -2.142314 |
| C  | 1.398625  | 3.116953  | -2.469498 |
| C  | -0.848498 | 0.385455  | -2.121188 |
| C  | 2.044746  | -3.504293 | -1.637033 |
| C  | 5.165407  | 1.498035  | -1.855498 |
| C  | 5.779896  | -0.888713 | -1.453751 |
| H  | -4.322354 | 5.581531  | -1.770842 |
| C  | 0.631252  | -3.438884 | -1.479408 |
| C  | -0.612535 | 1.791088  | -1.990395 |
| C  | -4.227612 | -2.672469 | -1.110596 |
| N  | -4.206068 | -1.314491 | -1.270542 |
| C  | 6.007343  | 0.518820  | -1.226960 |
| C  | 3.536599  | 3.318648  | -1.518142 |
| C  | 4.199711  | -3.159417 | -0.839292 |
| N  | -4.059930 | 1.498224  | -1.232470 |
| H  | -1.928291 | 5.193284  | -1.107217 |
| C  | -1.018741 | -1.814810 | -1.134921 |
| C  | -3.984084 | 2.850493  | -1.034609 |
| C  | 4.673381  | 2.626764  | -1.046375 |
| C  | 2.918542  | -3.720446 | -0.507232 |
| C  | -1.232469 | -0.394453 | -1.013290 |
| C  | 1.256407  | 3.761051  | -1.182159 |
| C  | 5.999015  | -1.596691 | -0.204122 |
| H  | -4.223153 | -4.419912 | 0.086174  |
| C  | -4.213141 | -3.334897 | 0.103015  |
| C  | 0.101070  | -3.614448 | -0.153446 |
| C  | -0.739190 | 2.399572  | -0.751960 |
| C  | 2.584734  | 3.911093  | -0.616168 |
| Sc | 1.125304  | -1.568291 | -0.192588 |
| C  | 5.057808  | -2.621521 | 0.170641  |
| C  | 6.435810  | 0.676395  | 0.138029  |
| C  | -0.916931 | -2.617724 | 0.047778  |
| Ni | -4.129298 | 0.072228  | 0.154679  |
| O  | 2.407701  | -0.177444 | -0.047656 |
| C  | 0.193138  | 3.439516  | -0.352543 |
| Sc | 4.261736  | -0.086497 | 0.326157  |
| C  | -3.954847 | 3.474546  | 0.199611  |
| H  | -3.896778 | 4.558345  | 0.214153  |

|   |           |           |          |
|---|-----------|-----------|----------|
| C | 4.909224  | 2.620863  | 0.413135 |
| C | 6.440558  | -0.615568 | 0.770019 |
| C | 2.405157  | -3.678572 | 0.835068 |
| C | -1.261875 | 0.222498  | 0.327175 |
| H | -2.095185 | -5.106952 | 1.198344 |
| C | -1.064782 | 1.616417  | 0.407035 |
| C | 5.762780  | 1.610504  | 0.991006 |
| C | 0.976668  | -3.607879 | 1.003905 |
| C | -4.072489 | -2.712342 | 1.330400 |
| C | 2.767568  | 3.809890  | 0.753541 |
| C | 4.557610  | -2.608634 | 1.518616 |
| N | -4.043448 | -1.360101 | 1.531306 |
| H | -4.449776 | -5.419793 | 2.077214 |
| C | -0.700723 | -1.994598 | 1.328030 |
| C | -3.916211 | 2.812417  | 1.414966 |
| C | 3.926941  | 3.151789  | 1.272235 |
| C | 3.238645  | -3.084267 | 1.834666 |
| H | -2.189947 | -6.473789 | 2.328077 |
| N | -3.971132 | 1.456180  | 1.577744 |
| C | 0.387298  | 3.327222  | 1.075971 |
| C | -2.289542 | -5.387917 | 2.239085 |
| C | -0.909194 | -0.585623 | 1.504120 |
| C | 5.773431  | -0.484591 | 2.037935 |
| H | -1.872419 | 5.164012  | 1.445180 |
| C | 0.442087  | -2.632734 | 1.939428 |
| C | -3.683293 | -4.916960 | 2.678431 |
| C | -0.421437 | 2.227918  | 1.544996 |
| C | 1.647195  | 3.533127  | 1.624901 |
| C | 5.352660  | 0.893216  | 2.190699 |
| C | -3.829610 | -3.430371 | 2.563887 |
| C | 4.841011  | -1.499253 | 2.400169 |
| H | -1.515233 | -4.918694 | 2.855362 |
| H | -4.257692 | 5.499153  | 2.235368 |
| C | -3.801278 | -1.202369 | 2.869161 |
| C | -2.107837 | 5.419236  | 2.484310 |
| C | 2.688211  | -2.209113 | 2.827865 |
| C | 3.530755  | 2.459573  | 2.500501 |
| C | -3.701749 | 3.483045  | 2.681149 |
| H | -1.995393 | 6.500272  | 2.608486 |
| H | -3.861229 | -5.221197 | 3.715340 |
| C | -3.769204 | 1.248145  | 2.914062 |
| C | 1.293758  | -1.912779 | 2.850276 |
| C | -0.221251 | 0.027303  | 2.582529 |
| C | -3.526063 | 4.961539  | 2.849973 |



|   |           |           |          |
|---|-----------|-----------|----------|
| C | 0.028618  | 1.437820  | 2.589175 |
| C | 4.123580  | 1.238434  | 2.880482 |
| C | 2.130310  | 2.696643  | 2.693545 |
| C | 3.658117  | -1.199910 | 3.141460 |
| C | -3.646834 | -2.482762 | 3.526283 |
| H | -1.367152 | 4.918612  | 3.116338 |
| C | -3.690346 | 0.009562  | 3.525447 |
| C | 0.899806  | -0.613852 | 3.222655 |
| C | 1.323945  | 1.671092  | 3.181338 |
| C | 3.267444  | 0.160673  | 3.401896 |
| C | -3.600414 | 2.500887  | 3.620237 |
| C | 1.883407  | 0.406300  | 3.542299 |
| H | -3.740211 | 5.235880  | 3.888492 |
| H | -3.507800 | -0.012442 | 4.595002 |
| C | -3.245300 | -2.665291 | 4.957674 |
| H | -1.151765 | -3.106277 | 4.561945 |
| H | -3.488693 | -3.683669 | 5.278733 |
| H | -1.478397 | -1.394462 | 4.839450 |
| H | -3.825550 | -1.994045 | 5.601841 |
| C | -3.297557 | 2.627570  | 5.082604 |
| C | -1.745337 | -2.407183 | 5.160710 |
| H | -1.171691 | 3.036726  | 4.866489 |
| H | -1.544275 | 1.328159  | 5.091669 |
| H | -3.550384 | 3.639354  | 5.417377 |
| H | -3.938160 | 1.947640  | 5.656829 |
| C | -1.824201 | 2.340687  | 5.402981 |
| H | -1.458970 | -2.523968 | 6.210077 |
| H | -1.628426 | 2.439080  | 6.474719 |

Coordinates of DFT-optimized  $[C_2(7892)-C_{70}]^{4-}$

|   |           |           |           |
|---|-----------|-----------|-----------|
| C | -0.000455 | 3.698662  | -0.121201 |
| C | 0.000455  | 3.574750  | 1.306914  |
| C | -1.143822 | 3.315455  | -0.887158 |
| C | -1.132068 | 3.125705  | 2.001146  |
| C | 1.348602  | 3.366574  | -0.587020 |
| C | 1.322665  | 3.122842  | 1.720638  |
| C | -2.344318 | 2.822970  | -0.166968 |
| C | -2.298039 | 2.710911  | 1.251064  |
| C | 2.144467  | 2.974494  | 0.546114  |
| C | -0.926420 | 2.868688  | -2.226505 |
| C | 1.555835  | 2.759728  | -1.855296 |
| C | -0.967307 | 2.241289  | 3.131090  |
| C | 0.418118  | 2.542660  | -2.690365 |
| C | 1.472863  | 2.259456  | 2.797747  |
| C | -3.257239 | 1.965890  | -0.846446 |
| C | 0.306126  | 1.834640  | 3.546831  |
| C | -2.867205 | 1.547152  | 1.920609  |
| C | -1.826023 | 1.937862  | -2.847901 |
| C | 3.107334  | 1.911570  | 0.446694  |
| C | 2.689590  | 1.913054  | -2.016601 |
| C | -3.031372 | 1.567090  | -2.216907 |
| C | -2.053650 | 1.264516  | 3.073977  |
| C | 3.493521  | 1.525899  | -0.862507 |
| C | 2.411128  | 1.141842  | 2.705275  |
| C | 0.336710  | 1.376214  | -3.521229 |
| C | -3.856760 | 0.812750  | -0.158322 |
| C | 3.170225  | 0.909345  | 1.530904  |
| C | -1.055420 | 0.973141  | -3.601437 |
| C | -3.478070 | 0.499112  | 1.173915  |
| C | 0.524944  | 0.456201  | 3.962148  |
| C | 2.647359  | 0.785016  | -2.927049 |
| C | -3.508770 | 0.233667  | -2.382694 |
| C | -1.844244 | -0.048478 | 3.471013  |
| C | 1.844244  | 0.048478  | 3.471013  |
| C | 1.410820  | 0.420723  | -3.547690 |
| C | 4.029208  | 0.222728  | -1.122788 |
| C | -4.029208 | -0.222728 | -1.122788 |
| C | -0.524944 | -0.456201 | 3.962148  |
| C | 3.478070  | -0.499112 | 1.173915  |
| C | 3.508770  | -0.233667 | -2.382694 |
| C | -1.410820 | -0.420723 | -3.547690 |
| C | -3.170225 | -0.909345 | 1.530904  |

|   |           |           |           |
|---|-----------|-----------|-----------|
| C | -2.411128 | -1.141842 | 2.705275  |
| C | 3.856760  | -0.812750 | -0.158322 |
| C | -2.647359 | -0.785016 | -2.927049 |
| C | 2.053650  | -1.264516 | 3.073977  |
| C | 1.055420  | -0.973141 | -3.601437 |
| C | -3.493521 | -1.525899 | -0.862507 |
| C | 2.867205  | -1.547152 | 1.920609  |
| C | -0.336710 | -1.376214 | -3.521229 |
| C | -0.306126 | -1.834640 | 3.546831  |
| C | -3.107334 | -1.911570 | 0.446694  |
| C | 3.031372  | -1.567090 | -2.216907 |
| C | -2.689590 | -1.913054 | -2.016601 |
| C | -1.472863 | -2.259456 | 2.797747  |
| C | 0.967307  | -2.241289 | 3.131090  |
| C | 3.257239  | -1.965890 | -0.846446 |
| C | 1.826023  | -1.937862 | -2.847901 |
| C | -0.418118 | -2.542660 | -2.690365 |
| C | 2.298039  | -2.710911 | 1.251064  |
| C | -1.555835 | -2.759728 | -1.855296 |
| C | -2.144467 | -2.974494 | 0.546114  |
| C | -1.322665 | -3.122842 | 1.720638  |
| C | 2.344318  | -2.822970 | -0.166968 |
| C | 1.132068  | -3.125705 | 2.001146  |
| C | 0.926420  | -2.868688 | -2.226505 |
| C | -1.348602 | -3.366574 | -0.587020 |
| C | -0.000455 | -3.574750 | 1.306914  |
| C | 1.143822  | -3.315455 | -0.887158 |
| C | 0.000455  | -3.698662 | -0.121201 |
